# Supplementary material for: Facile synthesis of ZnMoO4/AlPO4-5 nanorod composites as visible-light-driven photocatalysts and high-performance energy storage materials
Source: Royal Society of Chemistry journal article supplement (doi:10.1039/d2ra00268j), 2022-01-01
Supplement: d2ra00268j1.pdf [file d2ra00268j1.pdf]

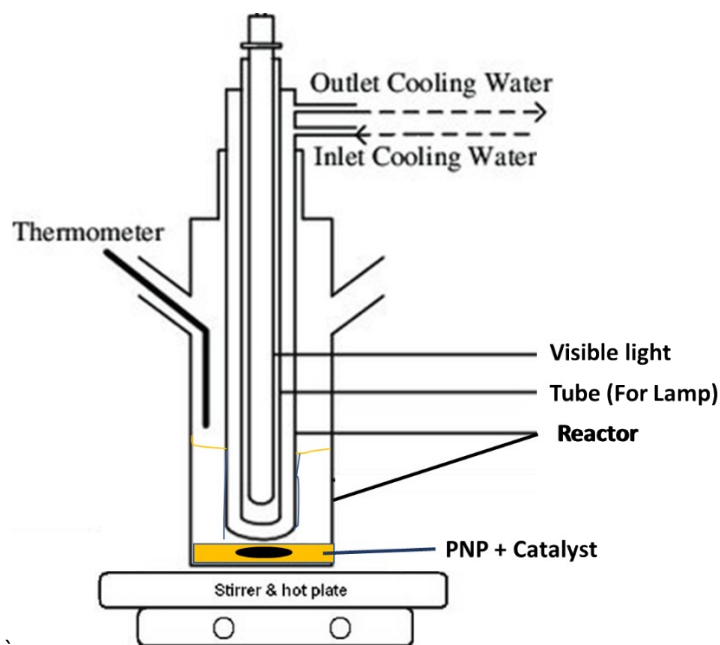

S1: Diagram of the photoreactor.

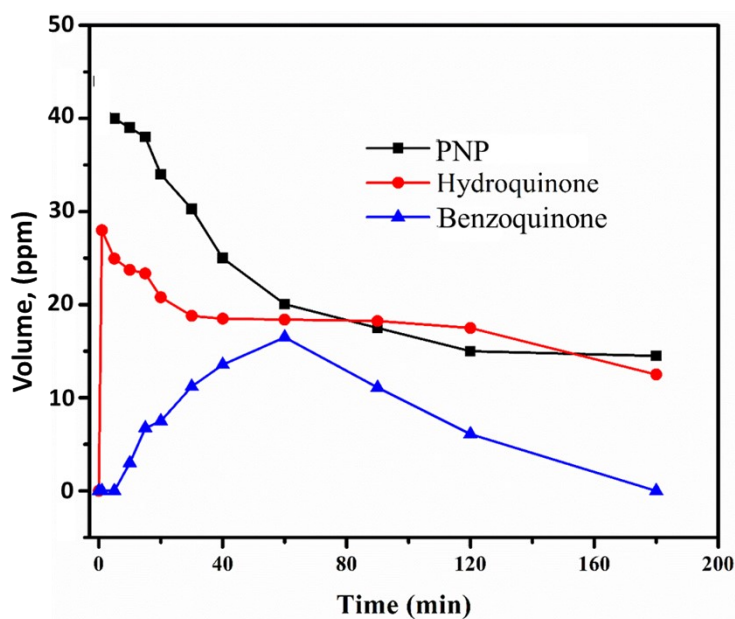

S2: Variation of Hydroquinone and 4-Benzoquinone (BZQ) as intermediate products concentration during the degradation of PNP

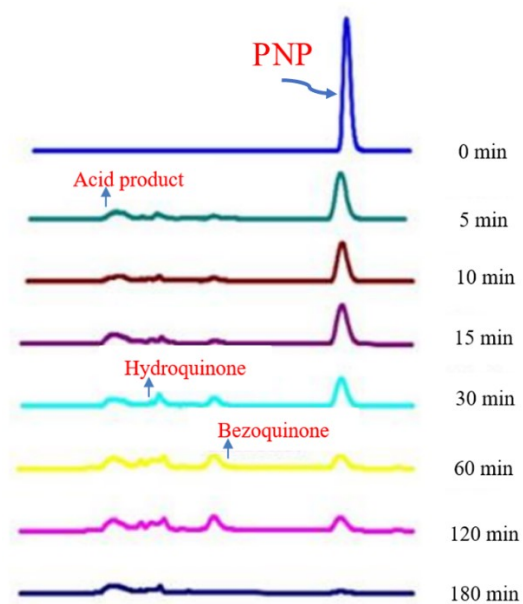

**S3: HPLC chromatograms for PNP degradation at different times of irradiation.**
